# Supplementary material for: Solution processed organic solar cells based on A–D–D′–D–A small molecule with benzo[1,2-b:4,5-b′]dithiophene donor (D′) unit, cyclopentadithiophene donor (D) and ethylrhodanine acceptor unit having 6% light to energy conversion efficiency
Source: Royal Society of Chemistry journal article supplement (doi:10.1039/c4ta05807k), 2015-01-01
Supplement: c4ta05807k1.pdf [file c4ta05807k1.pdf]

### Supporting Information

#### **Solution processed organic solar cells based on A-D-D'-D-A Small Molecule with Benzo[1,2-b:4,5-b']dithiophene donor unit and ethylrhodanine acceptor unit having 6 % light to energy conversion efficiency**

Challuri Vijay Kumar<sup>a</sup>, Lydia Cabau<sup>a</sup>, Emmanuel N. Koukaras<sup>b,c</sup>, Aurelien Viterisi<sup>a</sup>, Ganesh D. Sharma<sup>d\*</sup> and Emilio Palomares<sup>a, e\*</sup>

<sup>a</sup>Institute of Chemical Research of Catalonia (ICIQ), Avda. Països Catalans 16, E-43007 Tarragona, Spain

<sup>b</sup>Institute of Chemical Engineering Sciences, Foundation for Research & Technology, Hellas, Stadiou Str. Platani, Patras, 26504, Greece

<sup>c</sup>Molecular Engineering Laboratory, Department of Physics, University of Patras, Patras, 26500, GR, Greece

<sup>d</sup>R & D Center for Engineering and Science, JEC group of Colleges, Jaipur Engineering College, Kukas, Jaipur 303101, India.

<sup>e</sup>Catalan Institution for Research and Advance Studies (ICREA), Avda. Lluís Companys 23, E-08010 Barcelona, Spain

\*Corresponding authors: [gdsharma273@gmail.com](mailto:gdsharma273@gmail.com) and [sharmagd\\_in@yahoo.com](mailto:sharmagd_in@yahoo.com) (G.D. sharma) and [epalomares@iciq.es](mailto:epalomares@iciq.es) (Emilio Palomares)

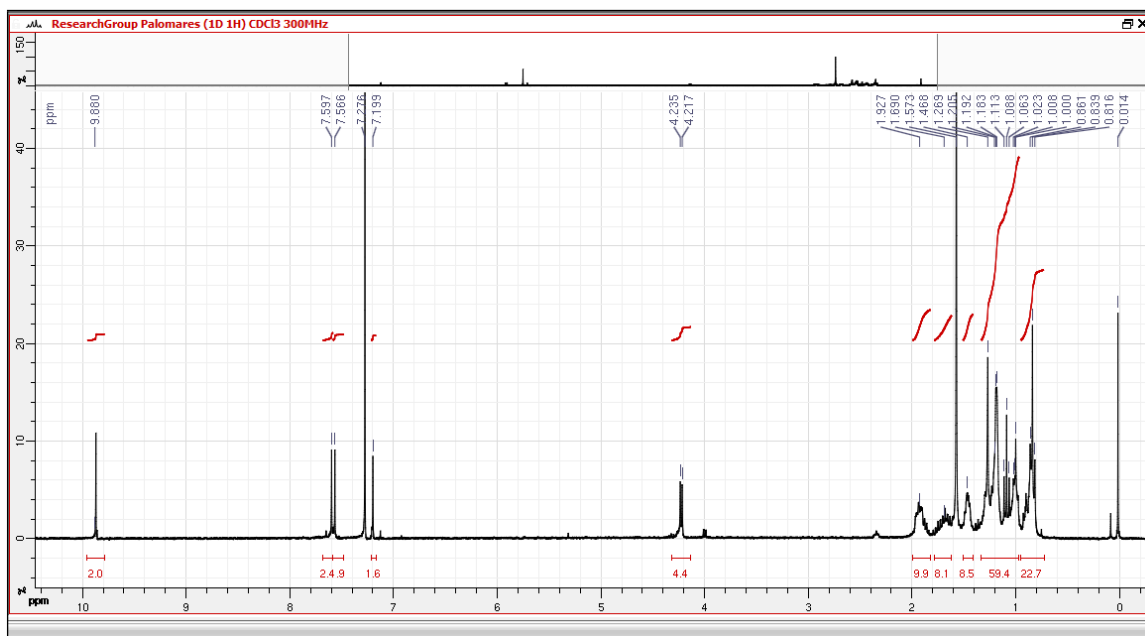

**Fig. S1** <sup>1</sup>H NMR spectra of compound 3 recorded in CDCl<sub>3</sub>.

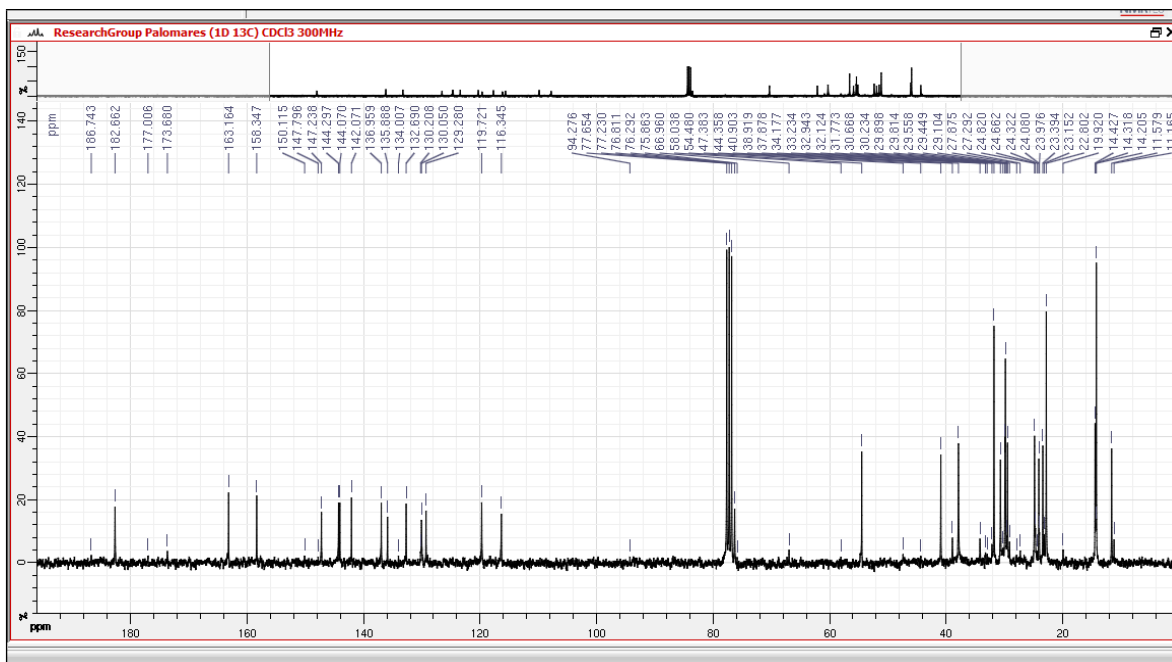

Fig. S2  $^{13}\text{C}$  NMR spectra of compound **3** recorded in  $\text{CDCl}_3$ .

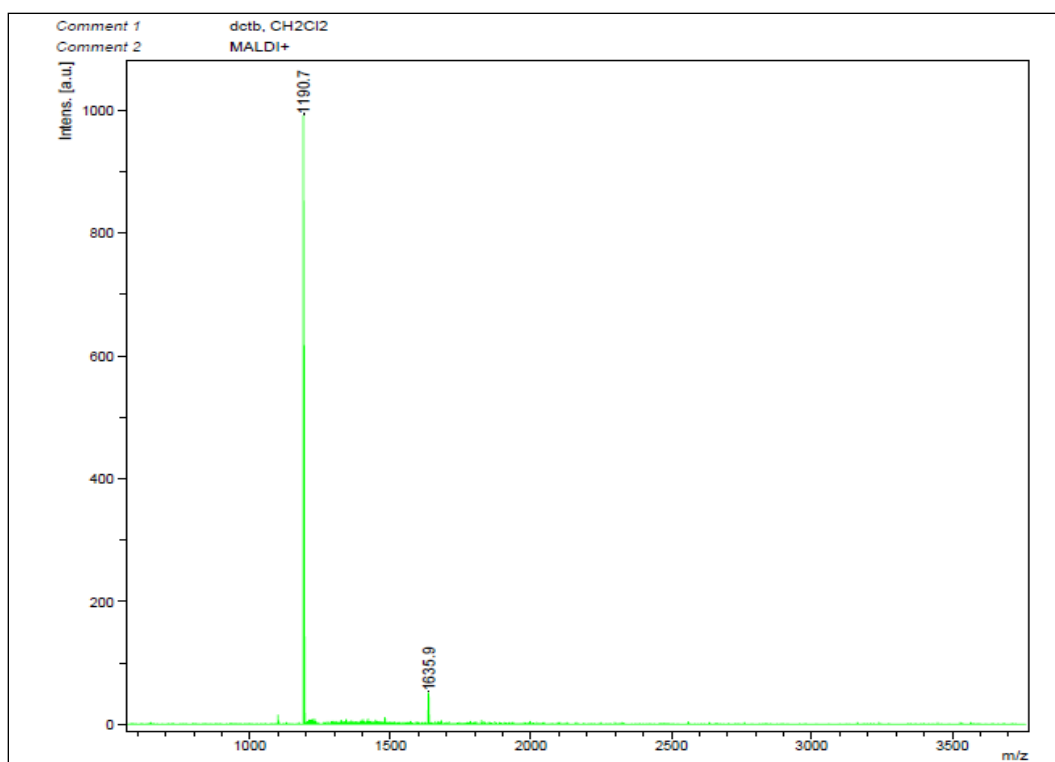

Fig. S3 MALDI-TOF spectrum of compound **3**

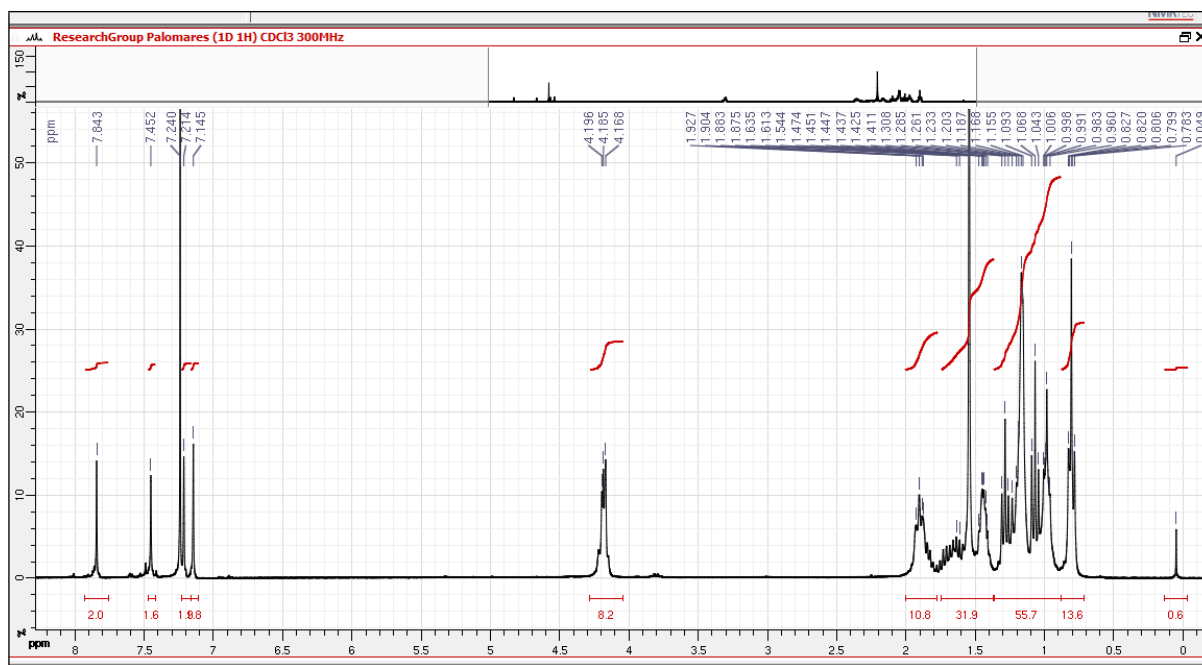

Fig. S4  $^1\text{H}$  NMR spectra of compound  $\text{BDT}(\text{CDTRH})_2$  recorded in  $\text{CDCl}_3$ .

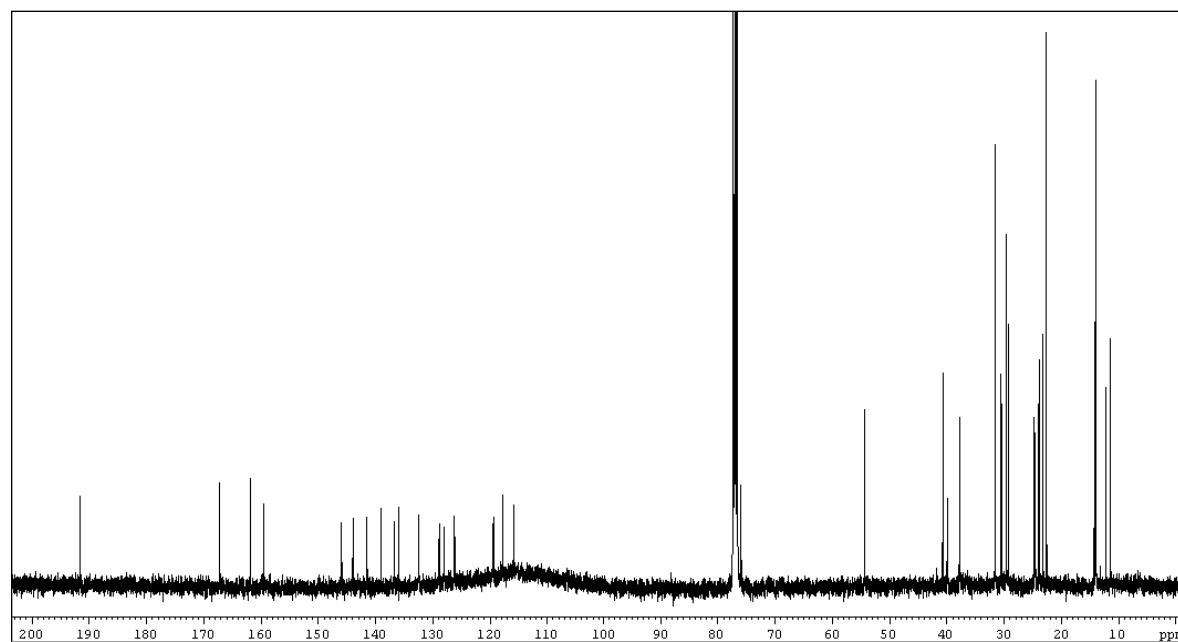

Fig. S5  $^{13}\text{C}$  NMR spectra of compound  $\text{BDT}(\text{CDTRH})_2$  recorded in  $\text{CDCl}_3$ .

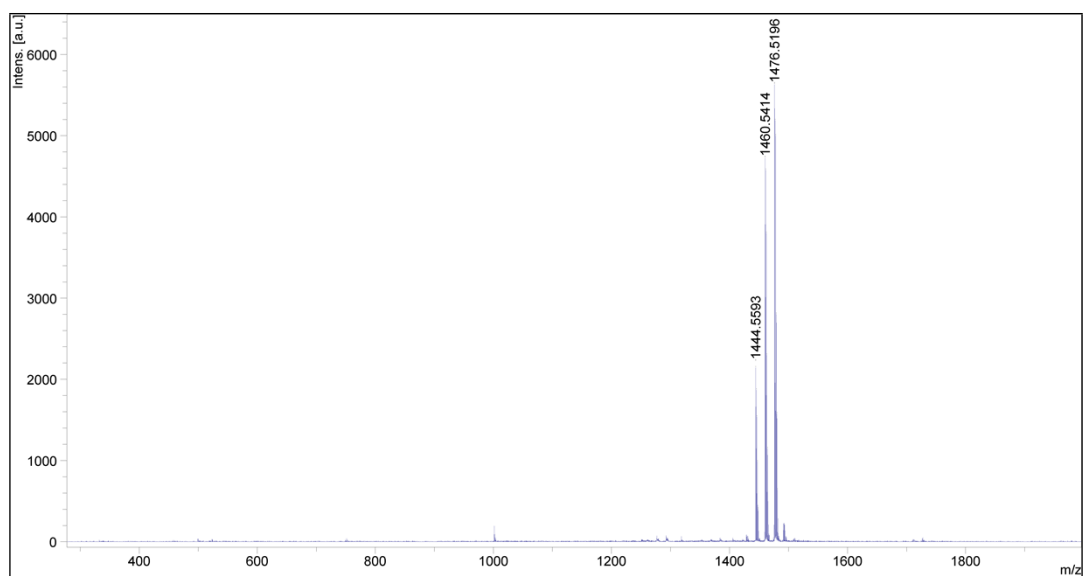

**Fig. S6** MALDI-TOF spectrum of compound **BDT(CDTRH)<sub>2</sub>**.

### Total and Partial Density of States

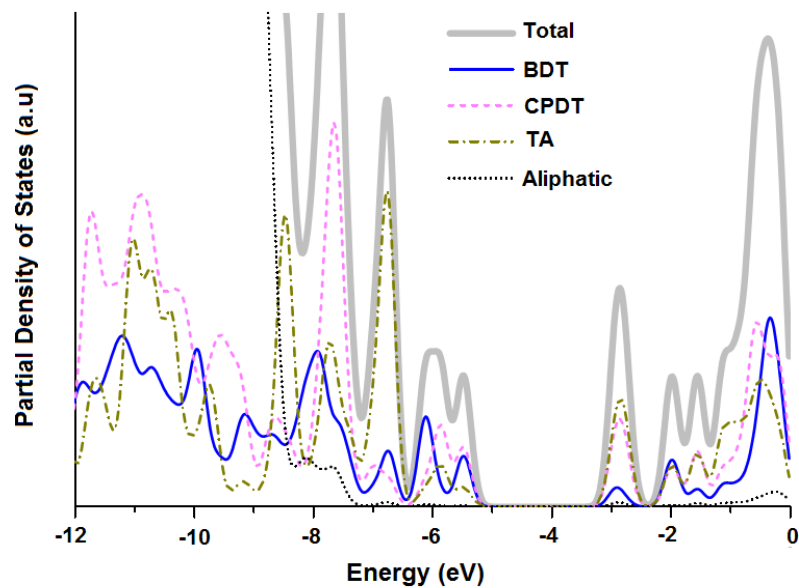

**Figure S7.** Total and partial density of states of the **BDT(CDTRH)<sub>2</sub>** (calculated using the M06 functional).

## Energies of BDT(CDTRH)<sub>2</sub> isomers

The energetically lowest isomers of **BDT(CDTRH)<sub>2</sub>** are shown in Table S1. We have included the absolute energy of the structures along the energy difference from the lowest energy structure (isomer 1). These values correspond to the DFT/PBE/TZVP level of theory. Isomer 1 was used as the main structure discussed in the text. The Cartesian coordinates for each of the structures are given in Table S2.

Alteration of alkyl group configurations, which have also been considered in these isomers, can have an impact on the energy of the structure even up to a few kcal mol<sup>-1</sup>. Alkyl configurations may also favor rotations of thiophene groups through steric repulsions, in which case the overall planarity of the structure is altered. In the provided density of states diagram contributions from the alkyl groups show up at low energies (first significant contributions is around -9 eV). Alkyl groups are not expected to contribute to states involved in excitations in the visible and near (and perhaps even middle-) ultra-violet region. Thus, insofar as the backbone of the structure remains more or less unaltered, isomers from purely alkyl reconfigurations should not impact the UV/Vis spectrum. We note that the calculations must be performed on structures that include the full alkyl groups (as performed here) so that the effects of the alkyl configurations can be accounted for and be assessed. This would not be the case if the alkyl groups had been truncated to simple methyl groups (a tactic followed to increase computational efficiency, which however in many cases has merits).

In all of the isomers considered alkyl groups extend out of main body (thiophene chain) plane. This does not favor pi-stacking of the molecule, and ultimately affects the crystallinity of the thin-films.

**Table S1.** Energy of energetically low **BDT(CDTRH)<sub>2</sub>** isomers (at the DFT/PBE/TZVP level of theory). Absolute energy and energy difference relative to isomer 1.

| isomer | Energy (Eh) | $\Delta E$<br>(kcal mol <sup>-1</sup> ) | STRUCTURE                                                                            |
|--------|-------------|-----------------------------------------|--------------------------------------------------------------------------------------|
| 1      | -7498.47445 | 0.00                                    | 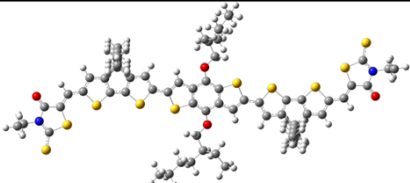 |

2 -7498.47419 +0.16

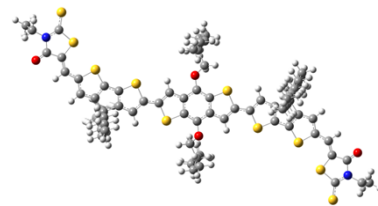

3 -7498.47293 +0.95

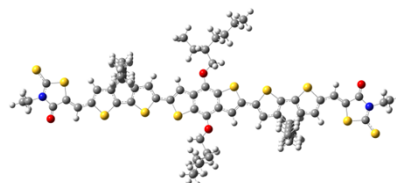

4 -7498.47275 +1.07

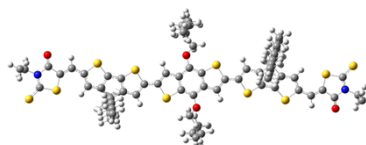

5 -7498.47132 +1.96

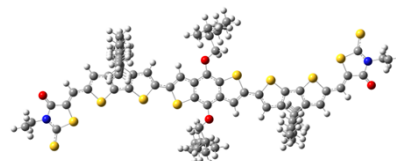

6 -7498.47111 +2.09

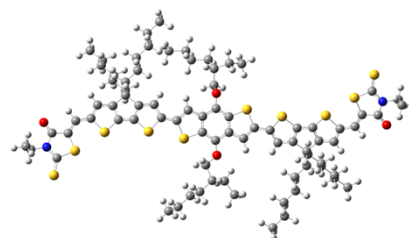

---

### Coordinates of the isomers

**Table S2.** Cartesian coordinates of **BDT(CDTRH)<sub>2</sub>** isomers 1,2 and 3, optimized at the DFT/PBE/TZVP level of theory (units in Ångströms).

| isomer 1 |       |        |        | isomer 2 |        |        |       | isomer 3 |       |        |        |
|----------|-------|--------|--------|----------|--------|--------|-------|----------|-------|--------|--------|
| atom     | x     | y      | z      | atom     | x      | y      | z     | atom     | x     | y      | z      |
| c        | 1.208 | 0.693  | 0.017  | c        | -0.699 | -1.208 | 0.003 | c        | 1.203 | 0.706  | -0.012 |
| c        | 1.223 | -0.726 | -0.173 | c        | 0.720  | -1.158 | 0.182 | c        | 1.225 | -0.714 | -0.192 |

|   |         |        |        |   |        |        |        |   |         |        |        |
|---|---------|--------|--------|---|--------|--------|--------|---|---------|--------|--------|
| c | 0.042   | -1.470 | -0.236 | c | 1.410  | 0.056  | 0.219  | c | 0.048   | -1.462 | -0.263 |
| c | -1.177  | -0.761 | -0.102 | c | 0.641  | 1.242  | 0.111  | c | -1.175  | -0.757 | -0.144 |
| c | -1.192  | 0.659  | 0.089  | c | -0.780 | 1.191  | -0.047 | c | -1.199  | 0.664  | 0.035  |
| c | -0.011  | 1.402  | 0.152  | c | -1.465 | -0.023 | -0.124 | c | -0.021  | 1.413  | 0.100  |
| c | 2.514   | 1.258  | 0.035  | c | -1.208 | -2.536 | 0.020  | c | 2.506   | 1.277  | 0.018  |
| c | 3.527   | 0.346  | -0.169 | c | -0.251 | -3.507 | 0.223  | c | 3.525   | 0.367  | -0.168 |
| h | 2.691   | 2.316  | 0.220  | h | -2.269 | -2.753 | -0.095 | h | 2.675   | 2.337  | 0.193  |
| c | -2.482  | -1.328 | -0.120 | c | 1.137  | 2.572  | 0.185  | c | -2.477  | -1.331 | -0.161 |
| c | -3.497  | -0.417 | 0.077  | c | 0.163  | 3.545  | 0.116  | c | -3.497  | -0.423 | 0.028  |
| h | -2.654  | -2.388 | -0.301 | h | 2.197  | 2.792  | 0.303  | h | -2.643  | -2.393 | -0.329 |
| o | -0.068  | -2.816 | -0.461 | o | 2.752  | 0.228  | 0.431  | o | -0.051  | -2.809 | -0.488 |
| o | 0.102   | 2.748  | 0.379  | s | 1.371  | -2.791 | 0.394  | o | 0.087   | 2.762  | 0.304  |
| s | 2.884   | -1.296 | -0.398 | s | -1.458 | 2.826  | -0.063 | s | 2.891   | -1.279 | -0.389 |
| s | -2.856  | 1.225  | 0.306  | c | 1.231  | 7.278  | 0.374  | s | -2.867  | 1.225  | 0.241  |
| c | -7.396  | -0.454 | 0.047  | c | -0.156 | 7.258  | 0.194  | c | -7.399  | -0.529 | 0.046  |
| c | -6.961  | -1.773 | 0.219  | c | -0.719 | 8.676  | 0.175  | c | -6.935  | -1.839 | 0.208  |
| c | -8.150  | -2.724 | 0.331  | c | 0.562  | 9.484  | 0.373  | c | -8.099  | -2.817 | 0.331  |
| c | -9.305  | -1.737 | 0.188  | c | 1.670  | 8.628  | 0.483  | c | -9.276  | -1.855 | 0.208  |
| c | -8.820  | -0.429 | 0.029  | c | 0.909  | 10.831 | 0.476  | c | -8.825  | -0.534 | 0.046  |
| c | -10.699 | -1.803 | 0.174  | c | 2.287  | 11.040 | 0.666  | c | -10.667 | -1.965 | 0.219  |
| c | -11.315 | -0.550 | 0.004  | c | 0.308  | 4.968  | 0.174  | c | -11.321 | -0.730 | 0.062  |
| c | -4.910  | -0.665 | 0.110  | c | -0.673 | 5.958  | 0.080  | c | -4.907  | -0.690 | 0.075  |
| c | -5.565  | -1.890 | 0.262  | s | 3.158  | 9.483  | 0.714  | c | -5.536  | -1.928 | 0.233  |
| s | -10.089 | 0.739  | -0.140 | s | 1.920  | 5.685  | 0.411  | s | -10.129 | 0.592  | -0.099 |
| s | -6.074  | 0.663  | -0.088 | h | -1.726 | 5.716  | -0.064 | s | -6.100  | 0.615  | -0.102 |
| h | -5.019  | -2.821 | 0.417  | h | 0.214  | 11.670 | 0.421  | h | -4.970  | -2.848 | 0.378  |
| h | -11.291 | -2.712 | 0.280  | c | -1.412 | 9.007  | -1.176 | h | -11.209 | -2.903 | 0.334  |
| c | -8.149  | -3.787 | -0.803 | h | -2.317 | 8.379  | -1.249 | c | -8.092  | -3.868 | -0.814 |
| h | -7.282  | -4.449 | -0.639 | h | -1.768 | 10.050 | -1.123 | h | -7.208  | -4.514 | -0.670 |
| h | -9.045  | -4.417 | -0.671 | c | -1.738 | 8.910  | 1.326  | h | -8.973  | -4.519 | -0.676 |
| c | -8.176  | -3.455 | 1.703  | h | -2.078 | 9.958  | 1.263  | c | -8.094  | -3.556 | 1.697  |
| h | -9.067  | -4.107 | 1.716  | h | -2.625 | 8.287  | 1.116  | h | -8.973  | -4.225 | 1.717  |
| h | -7.303  | -4.130 | 1.738  | c | -1.239 | 8.620  | 2.743  | h | -7.208  | -4.215 | 1.718  |
| c | -8.178  | -2.562 | 2.945  | h | -0.897 | 7.573  | 2.808  | c | -8.100  | -2.668 | 2.943  |

|   |        |        |        |   |        |        |        |   |        |        |        |
|---|--------|--------|--------|---|--------|--------|--------|---|--------|--------|--------|
| h | -7.290 | -1.908 | 2.931  | h | -0.359 | 9.248  | 2.962  | h | -7.218 | -2.006 | 2.929  |
| h | -9.056 | -1.894 | 2.919  | c | -2.317 | 8.867  | 3.804  | h | -8.984 | -2.008 | 2.921  |
| c | -8.192 | -3.368 | 4.248  | h | -3.201 | 8.243  | 3.578  | c | -8.107 | -3.476 | 4.244  |
| h | -7.315 | -4.040 | 4.272  | h | -2.660 | 9.915  | 3.741  | h | -7.223 | -4.140 | 4.268  |
| h | -9.080 | -4.027 | 4.262  | c | -1.849 | 8.575  | 5.233  | h | -8.989 | -4.143 | 4.257  |
| c | -8.192 | -2.496 | 5.507  | h | -1.502 | 7.528  | 5.297  | c | -8.116 | -2.605 | 5.503  |
| h | -7.307 | -1.835 | 5.492  | h | -0.968 | 9.201  | 5.464  | h | -7.234 | -1.939 | 5.493  |
| h | -9.071 | -1.827 | 5.487  | c | -2.930 | 8.813  | 6.292  | h | -8.999 | -1.941 | 5.480  |
| c | -8.200 | -3.300 | 6.810  | h | -3.808 | 8.187  | 6.059  | c | -8.125 | -3.409 | 6.807  |
| h | -7.322 | -3.969 | 6.828  | h | -3.276 | 9.859  | 6.227  | h | -7.243 | -4.073 | 6.829  |
| h | -9.085 | -3.960 | 6.823  | c | -2.455 | 8.520  | 7.717  | h | -9.006 | -4.074 | 6.816  |
| c | -8.200 | -2.422 | 8.063  | h | -3.252 | 8.698  | 8.454  | c | -8.135 | -2.530 | 8.059  |
| h | -8.205 | -3.026 | 8.981  | h | -2.134 | 7.472  | 7.821  | h | -8.142 | -3.134 | 8.978  |
| h | -7.309 | -1.775 | 8.095  | h | -1.599 | 9.156  | 7.990  | h | -7.247 | -1.878 | 8.095  |
| h | -9.085 | -1.767 | 8.090  | c | -0.562 | 8.822  | -2.436 | h | -9.023 | -1.880 | 8.081  |
| c | -8.112 | -3.244 | -2.234 | h | 0.343  | 9.448  | -2.367 | c | -8.088 | -3.308 | -2.239 |
| h | -8.980 | -2.584 | -2.401 | h | -0.212 | 7.777  | -2.495 | h | -8.971 | -2.663 | -2.384 |
| h | -7.216 | -2.616 | -2.367 | c | -1.327 | 9.174  | -3.716 | h | -7.206 | -2.660 | -2.378 |
| c | -8.111 | -4.357 | -3.287 | h | -2.239 | 8.554  | -3.779 | c | -8.084 | -4.405 | -3.308 |
| h | -7.246 | -5.022 | -3.115 | h | -1.675 | 10.221 | -3.658 | h | -7.203 | -5.056 | -3.162 |
| h | -9.010 | -4.987 | -3.155 | c | -0.502 | 8.988  | -4.993 | h | -8.967 | -5.054 | -3.172 |
| c | -8.068 | -3.835 | -4.726 | h | -0.155 | 7.941  | -5.054 | c | -8.074 | -3.858 | -4.739 |
| h | -7.171 | -3.205 | -4.858 | h | 0.410  | 9.607  | -4.933 | h | -7.191 | -3.208 | -4.875 |
| h | -8.933 | -3.171 | -4.900 | c | -1.266 | 9.340  | -6.274 | h | -8.955 | -3.208 | -4.886 |
| c | -8.063 | -4.945 | -5.783 | h | -2.179 | 8.722  | -6.332 | c | -8.067 | -4.948 | -5.815 |
| h | -7.199 | -5.608 | -5.607 | h | -1.612 | 10.387 | -6.212 | h | -7.188 | -5.599 | -5.666 |
| h | -8.961 | -5.574 | -5.651 | c | -0.436 | 9.149  | -7.545 | h | -8.950 | -5.596 | -5.681 |
| c | -8.017 | -4.413 | -7.217 | h | -0.106 | 8.105  | -7.651 | c | -8.054 | -4.389 | -7.240 |
| h | -7.112 | -3.809 | -7.388 | h | -1.011 | 9.410  | -8.446 | h | -7.164 | -3.765 | -7.414 |
| h | -8.015 | -5.232 | -7.952 | h | 0.465  | 9.781  | -7.530 | h | -8.048 | -5.194 | -7.990 |
| h | -8.887 | -3.774 | -7.433 | c | -1.814 | -8.584 | 0.430  | h | -8.939 | -3.763 | -7.429 |
| c | 8.852  | 0.356  | -0.199 | c | -0.729 | -9.422 | 0.733  | c | 8.853  | 0.448  | -0.191 |
| c | 9.334  | 1.663  | -0.373 | c | 0.552  | -8.606 | 0.885  | c | 9.312  | 1.767  | -0.346 |
| c | 8.176  | 2.650  | -0.500 | c | 0.015  | -7.202 | 0.626  | c | 8.140  | 2.738  | -0.446 |



|   |        |        |        |   |        |         |        |   |        |        |        |
|---|--------|--------|--------|---|--------|---------|--------|---|--------|--------|--------|
| c | 6.990  | 1.700  | -0.360 | c | -1.359 | -7.236  | 0.367  | c | 6.970  | 1.767  | -0.322 |
| c | 7.427  | 0.382  | -0.188 | c | 0.545  | -5.903  | 0.595  | c | 7.427  | 0.452  | -0.175 |
| c | 5.593  | 1.818  | -0.383 | c | -0.414 | -4.927  | 0.316  | c | 5.572  | 1.864  | -0.346 |
| c | 4.940  | 0.593  | -0.216 | c | -2.464 | -10.990 | 0.593  | c | 4.936  | 0.628  | -0.203 |
| c | 11.347 | 0.475  | -0.229 | c | -1.094 | -10.766 | 0.824  | c | 11.350 | 0.625  | -0.244 |
| c | 10.728 | 1.728  | -0.388 | s | -2.020 | -5.656  | 0.080  | c | 10.704 | 1.866  | -0.375 |
| s | 6.107  | -0.734 | -0.029 | s | -3.303 | -9.451  | 0.253  | s | 6.122  | -0.686 | -0.039 |
| s | 10.123 | -0.812 | -0.053 | h | -0.418 | -11.591 | 1.051  | s | 10.151 | -0.689 | -0.078 |
| h | 11.317 | 2.637  | -0.511 | h | 1.591  | -5.651  | 0.775  | h | 11.250 | 2.802  | -0.491 |
| h | 5.045  | 2.747  | -0.536 | c | 1.157  | -8.738  | 2.311  | h | 5.012  | 2.789  | -0.483 |
| c | 8.198  | 3.721  | 0.626  | h | 1.504  | -9.779  | 2.433  | c | 8.152  | 3.778  | 0.709  |
| h | 9.095  | 4.347  | 0.475  | h | 2.062  | -8.107  | 2.349  | h | 9.034  | 4.425  | 0.567  |
| h | 7.331  | 4.386  | 0.471  | c | 1.633  | -9.016  | -0.154 | h | 7.270  | 4.430  | 0.581  |
| c | 8.177  | 3.369  | -1.878 | h | 2.517  | -8.378  | 0.016  | c | 8.126  | 3.490  | -1.805 |
| h | 7.302  | 4.043  | -1.902 | h | 1.950  | -10.046 | 0.084  | h | 7.243  | 4.154  | -1.810 |
| h | 9.067  | 4.023  | -1.913 | c | 1.224  | -8.935  | -1.626 | h | 9.008  | 4.154  | -1.829 |
| c | 8.158  | 2.466  | -3.112 | h | 0.341  | -9.573  | -1.801 | c | 8.113  | 2.614  | -3.059 |
| h | 9.038  | 1.801  | -3.097 | h | 0.914  | -7.904  | -1.867 | h | 8.997  | 1.954  | -3.057 |
| h | 7.272  | 1.810  | -3.076 | c | 2.354  | -9.358  | -2.570 | h | 7.231  | 1.952  | -3.038 |
| c | 8.145  | 3.260  | -4.423 | h | 2.662  | -10.392 | -2.331 | c | 8.099  | 3.435  | -4.353 |
| h | 9.030  | 3.922  | -4.459 | h | 3.241  | -8.726  | -2.385 | h | 8.982  | 4.100  | -4.375 |
| h | 7.265  | 3.929  | -4.437 | c | 1.979  | -9.275  | -4.052 | h | 7.216  | 4.100  | -4.355 |
| c | 8.126  | 2.377  | -5.673 | h | 1.093  | -9.908  | -4.242 | c | 8.085  | 2.575  | -5.620 |
| h | 9.008  | 1.711  | -5.663 | h | 1.671  | -8.242  | -4.294 | h | 8.968  | 1.910  | -5.618 |
| h | 7.243  | 1.713  | -5.636 | c | 3.111  | -9.697  | -4.995 | h | 7.204  | 1.909  | -5.599 |
| c | 8.107  | 3.168  | -6.984 | h | 3.415  | -10.731 | -4.754 | c | 8.071  | 3.390  | -6.916 |
| h | 8.989  | 3.832  | -7.019 | h | 3.996  | -9.067  | -4.802 | h | 8.952  | 4.055  | -6.936 |
| h | 7.226  | 3.833  | -6.994 | c | 2.732  | -9.608  | -6.474 | h | 7.189  | 4.055  | -6.916 |
| c | 8.089  | 2.277  | -8.228 | h | 3.563  | -9.918  | -7.124 | c | 8.057  | 2.522  | -8.175 |
| h | 8.076  | 2.873  | -9.152 | h | 1.870  | -10.253 | -6.704 | h | 8.046  | 3.134  | -9.089 |
| h | 8.977  | 1.626  | -8.264 | h | 2.457  | -8.578  | -6.753 | h | 8.945  | 1.872  | -8.221 |
| h | 7.201  | 1.626  | -8.238 | c | 0.231  | -8.370  | 3.474  | h | 7.169  | 1.871  | -8.201 |
| c | 8.183  | 3.188  | 2.061  | h | -0.115 | -7.329  | 3.356  | c | 8.162  | 3.204  | 2.128  |
| h | 7.282  | 2.571  | 2.215  | h | -0.671 | -9.002  | 3.443  | h | 7.276  | 2.564  | 2.274  |

|   |        |        |        |   |        |        |        |   |        |        |        |
|---|--------|--------|--------|---|--------|--------|--------|---|--------|--------|--------|
| h | 9.046  | 2.520  | 2.216  | c | 0.912  | -8.525 | 4.838  | h | 9.040  | 2.549  | 2.254  |
| c | 8.215  | 4.309  | 3.106  | h | 1.263  | -9.566 | 4.956  | c | 8.184  | 4.291  | 3.207  |
| h | 9.119  | 4.925  | 2.955  | h | 1.818  | -7.893 | 4.869  | h | 9.070  | 4.935  | 3.061  |
| h | 7.356  | 4.985  | 2.944  | c | 0.006  | -8.162 | 6.018  | h | 7.305  | 4.950  | 3.084  |
| c | 8.188  | 3.797  | 4.549  | h | -0.900 | -8.794 | 5.991  | c | 8.199  | 3.732  | 4.633  |
| h | 9.045  | 3.120  | 4.712  | h | -0.347 | -7.122 | 5.902  | h | 9.077  | 3.073  | 4.757  |
| h | 7.283  | 3.183  | 4.702  | c | 0.685  | -8.314 | 7.383  | h | 7.313  | 3.088  | 4.782  |
| c | 8.222  | 4.913  | 5.598  | h | 1.036  | -9.354 | 7.499  | c | 8.224  | 4.812  | 5.719  |
| h | 9.128  | 5.525  | 5.446  | h | 1.590  | -7.683 | 7.409  | h | 9.109  | 5.455  | 5.569  |
| h | 7.367  | 5.591  | 5.433  | c | -0.228 | -7.949 | 8.556  | h | 7.346  | 5.469  | 5.597  |
| c | 8.192  | 4.392  | 7.036  | h | -1.125 | -8.587 | 8.575  | c | 8.242  | 4.240  | 7.139  |
| h | 9.054  | 3.739  | 7.241  | h | 0.287  | -8.068 | 9.521  | h | 9.127  | 3.606  | 7.301  |
| h | 8.219  | 5.216  | 7.765  | h | -0.567 | -6.904 | 8.486  | h | 8.261  | 5.038  | 7.896  |
| h | 7.280  | 3.806  | 7.228  | c | 3.678  | -0.643 | -0.262 | h | 7.352  | 3.621  | 7.329  |
| c | 0.884  | -3.706 | 0.167  | h | 3.327  | -0.767 | -1.300 | c | 0.866  | -3.694 | 0.199  |
| h | 1.071  | -3.361 | 1.196  | h | 3.700  | -1.638 | 0.217  | h | 0.998  | -3.338 | 1.233  |
| h | 1.841  | -3.688 | -0.384 | c | 5.082  | -0.034 | -0.227 | h | 1.850  | -3.683 | -0.300 |
| c | 0.306  | -5.120 | 0.158  | h | 4.970  | 1.052  | -0.404 | c | 0.284  | -5.107 | 0.173  |
| h | -0.652 | -5.076 | 0.707  | c | 5.797  | -0.240 | 1.121  | h | -0.704 | -5.052 | 0.665  |
| c | -0.011 | -5.615 | -1.270 | h | 5.909  | -1.327 | 1.293  | c | 0.047  | -5.617 | -1.265 |
| h | -0.534 | -6.582 | -1.179 | h | 6.822  | 0.154  | 1.018  | h | -0.488 | -6.580 | -1.193 |
| h | -0.729 | -4.918 | -1.729 | c | 5.139  | 0.407  | 2.343  | h | -0.639 | -4.921 | -1.773 |
| c | 1.195  | -5.781 | -2.199 | h | 4.142  | -0.007 | 2.545  | c | 1.303  | -5.802 | -2.120 |
| h | 1.925  | -6.504 | -1.806 | h | 5.758  | 0.256  | 3.239  | h | 2.003  | -6.526 | -1.678 |
| h | 0.872  | -6.146 | -3.185 | h | 5.018  | 1.492  | 2.199  | h | 1.035  | -6.176 | -3.119 |
| h | 1.721  | -4.828 | -2.365 | c | 5.920  | -0.627 | -1.381 | h | 1.845  | -4.856 | -2.266 |
| c | 1.238  | -6.084 | 0.921  | h | 5.803  | -1.726 | -1.391 | c | 1.165  | -6.065 | 1.001  |
| h | 2.266  | -6.003 | 0.526  | h | 6.986  | -0.445 | -1.164 | h | 2.216  | -5.989 | 0.670  |
| h | 0.913  | -7.115 | 0.699  | c | 5.604  | -0.063 | -2.771 | h | 0.853  | -7.098 | 0.767  |
| c | 1.265  | -5.898 | 2.443  | h | 4.535  | -0.205 | -3.010 | c | 1.098  | -5.867 | 2.520  |
| h | 1.636  | -4.891 | 2.702  | h | 5.769  | 1.029  | -2.762 | h | 1.455  | -4.859 | 2.794  |
| h | 0.233  | -5.953 | 2.835  | c | 6.447  | -0.692 | -3.886 | h | 0.042  | -5.915 | 2.845  |
| c | 2.132  | -6.938 | 3.161  | h | 6.271  | -1.781 | -3.902 | c | 1.912  | -6.905 | 3.300  |
| h | 3.161  | -6.887 | 2.765  | h | 7.517  | -0.560 | -3.648 | h | 2.964  | -6.861 | 2.971  |

|   |         |        |        |   |        |         |        |   |         |        |        |
|---|---------|--------|--------|---|--------|---------|--------|---|---------|--------|--------|
| h | 1.762   | -7.948 | 2.915  | c | 6.153  | -0.104  | -5.267 | h | 1.554   | -7.915 | 3.037  |
| c | 2.158   | -6.757 | 4.680  | h | 6.773  | -0.574  | -6.046 | c | 1.841   | -6.713 | 4.816  |
| h | 2.786   | -7.518 | 5.166  | h | 5.099  | -0.252  | -5.547 | h | 2.431   | -7.473 | 5.347  |
| h | 2.559   | -5.769 | 4.956  | h | 6.354  | 0.978   | -5.291 | h | 2.226   | -5.725 | 5.111  |
| h | 1.147   | -6.835 | 5.109  | c | -3.114 | -12.245 | 0.628  | h | 0.803   | -6.784 | 5.178  |
| c | -0.877  | 3.640  | -0.204 | c | 2.924  | 12.295  | 0.810  | c | -0.895  | 3.644  | -0.290 |
| h | -1.805  | 3.609  | 0.389  | h | -2.469 | -13.100 | 0.862  | h | -1.802  | 3.659  | 0.336  |
| h | -1.106  | 3.312  | -1.233 | h | 2.258  | 13.166  | 0.772  | h | -1.166  | 3.271  | -1.293 |
| c | -0.303  | 5.056  | -0.208 | c | 4.243  | 12.619  | 0.991  | c | -0.292  | 5.044  | -0.387 |
| h | 0.101   | 5.241  | 0.805  | c | 4.663  | 14.023  | 1.123  | h | 0.158   | 5.269  | 0.599  |
| c | 0.849   | 5.182  | -1.221 | n | 6.067  | 14.095  | 1.311  | c | 0.822   | 5.089  | -1.450 |
| h | 1.467   | 4.271  | -1.164 | c | 6.766  | 12.915  | 1.327  | h | 1.421   | 4.168  | -1.370 |
| h | 0.423   | 5.203  | -2.240 | c | -4.424 | -12.586 | 0.419  | h | 0.355   | 5.068  | -2.451 |
| c | 1.744   | 6.406  | -1.006 | c | -4.864 | -13.987 | 0.523  | c | 1.752   | 6.300  | -1.336 |
| h | 2.218   | 6.377  | -0.013 | n | -6.258 | -14.079 | 0.277  | h | 2.267   | 6.311  | -0.363 |
| h | 2.545   | 6.447  | -1.759 | c | -6.929 | -12.918 | -0.012 | h | 2.522   | 6.282  | -2.121 |
| h | 1.182   | 7.349  | -1.078 | c | -6.916 | -15.391 | 0.305  | h | 1.210   | 7.252  | -1.434 |
| c | -1.431  | 6.075  | -0.472 | h | -7.941 | -15.222 | 0.661  | c | -1.405  | 6.076  | -0.660 |
| h | -0.978  | 7.028  | -0.791 | h | -6.362 | -15.990 | 1.039  | h | -0.945  | 6.997  | -1.053 |
| h | -2.033  | 5.730  | -1.334 | c | -6.916 | -16.070 | -1.063 | h | -2.055  | 5.699  | -1.471 |
| c | -2.353  | 6.352  | 0.721  | h | -7.412 | -17.048 | -0.987 | c | -2.262  | 6.446  | 0.557  |
| h | -2.812  | 5.415  | 1.080  | h | -7.463 | -15.466 | -1.800 | h | -2.726  | 5.543  | 0.990  |
| h | -1.747  | 6.733  | 1.563  | h | -5.890 | -16.234 | -1.419 | h | -1.607  | 6.857  | 1.346  |
| c | -3.466  | 7.356  | 0.405  | c | 6.718  | 15.404  | 1.449  | c | -3.364  | 7.461  | 0.235  |
| h | -4.072  | 6.972  | -0.434 | h | 7.580  | 15.259  | 2.114  | h | -4.020  | 7.047  | -0.550 |
| h | -3.014  | 8.297  | 0.047  | h | 5.981  | 16.058  | 1.934  | h | -2.905  | 8.366  | -0.200 |
| c | -4.374  | 7.646  | 1.602  | c | 7.154  | 15.981  | 0.104  | c | -4.203  | 7.847  | 1.454  |
| h | -5.163  | 8.368  | 1.345  | h | 7.628  | 16.960  | 0.261  | h | -4.985  | 8.575  | 1.192  |
| h | -4.867  | 6.728  | 1.960  | h | 7.883  | 15.322  | -0.386 | h | -4.701  | 6.967  | 1.890  |
| h | -3.802  | 8.064  | 2.445  | h | 6.291  | 16.123  | -0.561 | h | -3.579  | 8.297  | 2.242  |
| c | 12.742  | 0.243  | -0.205 | s | -5.790 | -11.539 | 0.017  | c | 12.724  | 0.281  | -0.227 |
| c | -12.709 | -0.316 | -0.051 | s | 5.640  | 11.544  | 1.104  | c | -12.697 | -0.397 | 0.012  |
| h | 13.366  | 1.138  | -0.310 | s | -8.542 | -12.732 | -0.341 | h | 12.978  | -0.779 | -0.114 |
| h | -13.337 | -1.210 | 0.048  | s | 8.398  | 12.702  | 1.525  | h | -12.958 | 0.659  | -0.125 |

|   |         |        |        |   |        |         |        |   |         |        |        |
|---|---------|--------|--------|---|--------|---------|--------|---|---------|--------|--------|
| c | -13.424 | 0.842  | -0.210 | o | 3.945  | 15.017  | 1.089  | c | -13.792 | -1.217 | 0.112  |
| c | -14.895 | 0.820  | -0.235 | o | -4.169 | -14.963 | 0.786  | c | -15.156 | -0.672 | 0.026  |
| n | -15.397 | 2.138  | -0.391 | o | -2.822 | -0.186  | -0.225 | n | -16.107 | -1.720 | 0.143  |
| c | -14.485 | 3.156  | -0.501 | c | -3.536 | 0.610   | -1.202 | c | -15.630 | -2.994 | 0.316  |
| c | 13.462  | -0.916 | -0.077 | h | -2.926 | 0.664   | -2.118 | c | 13.823  | 1.093  | -0.333 |
| c | 14.933  | -0.891 | -0.080 | h | -3.683 | 1.638   | -0.824 | c | 15.184  | 0.535  | -0.298 |
| n | 15.442  | -2.207 | 0.070  | c | -4.898 | -0.028  | -1.488 | n | 16.141  | 1.574  | -0.444 |
| c | 14.534  | -3.229 | 0.179  | h | -4.738 | -1.121  | -1.549 | c | 15.671  | 2.856  | -0.574 |
| c | 16.893  | -2.430 | 0.073  | c | -5.941 | 0.255   | -0.390 | c | 17.573  | 1.254  | -0.418 |
| h | 17.078  | -3.290 | 0.731  | c | -5.413 | 0.459   | -2.860 | h | 18.070  | 1.975  | -1.081 |
| h | 17.336  | -1.526 | 0.511  | h | -6.096 | 1.348   | -0.332 | h | 17.663  | 0.242  | -0.837 |
| c | 17.446  | -2.682 | -1.327 | h | -6.904 | -0.165  | -0.729 | c | 18.157  | 1.313  | 0.991  |
| h | 18.533  | -2.834 | -1.271 | c | -5.625 | -0.295  | 1.003  | h | 19.226  | 1.061  | 0.956  |
| h | 16.997  | -3.583 | -1.769 | h | -5.327 | 1.560   | -2.913 | h | 18.058  | 2.322  | 1.414  |
| h | 17.255  | -1.824 | -1.985 | h | -6.494 | 0.244   | -2.919 | h | 17.658  | 0.593  | 1.654  |
| c | -16.846 | 2.360  | -0.466 | c | -4.726 | -0.170  | -4.077 | c | -17.542 | -1.409 | 0.102  |
| h | -17.037 | 3.347  | -0.023 | h | -4.716 | 0.151   | 1.427  | h | -18.038 | -2.270 | -0.366 |
| h | -17.303 | 1.579  | 0.158  | h | -6.457 | -0.095  | 1.694  | h | -17.640 | -0.527 | -0.544 |
| c | -17.373 | 2.289  | -1.897 | h | -5.469 | -1.384  | 0.972  | c | -18.117 | -1.133 | 1.489  |
| h | -18.460 | 2.451  | -1.897 | h | -3.638 | 0.021   | -4.048 | h | -19.188 | -0.899 | 1.403  |
| h | -16.912 | 3.066  | -2.522 | h | -4.842 | -1.267  | -4.029 | h | -18.012 | -2.013 | 2.139  |
| h | -17.174 | 1.304  | -2.340 | c | -5.279 | 0.338   | -5.413 | h | -17.617 | -0.275 | 1.958  |
| s | 12.872  | -2.571 | 0.106  | h | -5.162 | 1.434   | -5.461 | s | 13.884  | 2.847  | -0.528 |
| s | -12.826 | 2.493  | -0.398 | h | -6.365 | 0.147   | -5.450 | s | -13.843 | -2.966 | 0.338  |
| s | 14.843  | -4.847 | 0.361  | c | -4.604 | -0.303  | -6.627 | s | 16.550  | 4.249  | -0.757 |
| s | -14.786 | 4.775  | -0.693 | h | -5.023 | 0.078   | -7.570 | s | -16.502 | -4.394 | 0.479  |
| o | -15.623 | -0.162 | -0.135 | h | -3.522 | -0.098  | -6.636 | o | -15.476 | 0.502  | -0.127 |
| o | 15.657  | 0.094  | -0.189 | h | -4.733 | -1.397  | -6.623 | o | 15.498  | -0.644 | -0.170 |

**Table S3.** Cartesian coordinates of **BDT(CDTRH)<sub>2</sub>** isomers 4,5 and 6, optimized at the DFT/PBE/TZVP level of theory (units in Ångströms).

| isomer 4 |   |   |   | isomer 5 |   |   |   | isomer 6 |   |   |   |
|----------|---|---|---|----------|---|---|---|----------|---|---|---|
| atom     | x | y | z | atom     | x | y | z | atom     | x | y | z |

|   |        |        |        |   |        |        |        |   |        |        |        |
|---|--------|--------|--------|---|--------|--------|--------|---|--------|--------|--------|
| c | -0.679 | -1.234 | 0.057  | c | -0.639 | -1.233 | 0.242  | c | -0.628 | -1.506 | 0.305  |
| c | 0.744  | -1.178 | 0.202  | c | 0.785  | -1.145 | 0.368  | c | 0.788  | -1.389 | 0.418  |
| c | 1.432  | 0.037  | 0.233  | c | 1.443  | 0.087  | 0.375  | c | 1.437  | -0.162 | 0.465  |
| c | 0.659  | 1.222  | 0.155  | c | 0.636  | 1.252  | 0.307  | c | 0.637  | 1.000  | 0.413  |
| c | -0.766 | 1.165  | 0.029  | c | -0.790 | 1.163  | 0.210  | c | -0.790 | 0.898  | 0.290  |
| c | -1.449 | -0.050 | -0.043 | c | -1.444 | -0.069 | 0.151  | c | -1.439 | -0.342 | 0.251  |
| c | -1.181 | -2.566 | 0.079  | c | -1.114 | -2.573 | 0.260  | c | -1.057 | -2.863 | 0.305  |
| c | -0.214 | -3.532 | 0.251  | c | -0.125 | -3.522 | 0.411  | c | -0.025 | -3.775 | 0.404  |
| h | -2.243 | -2.789 | -0.006 | h | -2.172 | -2.813 | 0.177  | h | -2.105 | -3.151 | 0.262  |
| c | 1.151  | 2.555  | 0.225  | c | 1.105  | 2.594  | 0.340  | c | 1.089  | 2.349  | 0.474  |
| c | 0.170  | 3.523  | 0.184  | c | 0.105  | 3.543  | 0.306  | c | 0.087  | 3.286  | 0.358  |
| h | 2.213  | 2.780  | 0.315  | h | 2.164  | 2.839  | 0.384  | h | 2.131  | 2.615  | 0.647  |
| o | 2.781  | 0.200  | 0.414  | o | 2.786  | 0.312  | 0.508  | o | 2.805  | -0.091 | 0.619  |
| s | 1.409  | -2.807 | 0.382  | s | 1.479  | -2.768 | 0.538  | o | -2.780 | -0.571 | 0.116  |
| s | -1.450 | 2.797  | 0.042  | s | -1.502 | 2.786  | 0.227  | s | 1.560  | -2.969 | 0.503  |
| c | 1.171  | 7.283  | 0.412  | c | -0.170 | 7.431  | 0.217  | s | -1.504 | 2.519  | 0.169  |
| c | -0.215 | 7.228  | 0.234  | c | 1.160  | 7.110  | 0.511  | c | -0.135 | 7.169  | 0.610  |
| c | -0.813 | 8.631  | 0.193  | c | 1.995  | 8.376  | 0.684  | c | 1.170  | 6.847  | 0.217  |
| c | 0.449  | 9.470  | 0.370  | c | 0.930  | 9.443  | 0.444  | c | 1.996  | 8.115  | -0.010 |
| c | 1.580  | 8.646  | 0.495  | c | -0.314 | 8.847  | 0.178  | c | 0.954  | 9.183  | 0.332  |
| c | 0.749  | 10.831 | 0.437  | c | 0.877  | 10.837 | 0.414  | c | -0.269 | 8.584  | 0.678  |
| c | 2.120  | 11.087 | 0.616  | c | -0.404 | 11.342 | 0.127  | c | 0.914  | 10.576 | 0.439  |
| c | 0.298  | 4.949  | 0.237  | c | 0.239  | 4.971  | 0.335  | c | -0.336 | 11.073 | 0.846  |
| c | -0.704 | 5.917  | 0.135  | c | 1.388  | 5.728  | 0.583  | c | 0.222  | 4.716  | 0.361  |
| s | 3.036  | 9.555  | 0.700  | s | -1.566 | 10.008 | -0.111 | c | 1.361  | 5.464  | 0.060  |
| s | 1.894  | 5.703  | 0.466  | s | -1.159 | 6.020  | 0.007  | s | -1.486 | 9.736  | 1.116  |
| h | -1.751 | 5.652  | -0.009 | h | 2.346  | 5.265  | 0.819  | s | -1.131 | 5.765  | 0.833  |
| h | 0.011  | 11.629 | 0.359  | h | 1.721  | 11.506 | 0.589  | h | 2.278  | 4.992  | -0.289 |
| c | -1.515 | 8.923  | -1.163 | c | 2.610  | 8.474  | 2.108  | h | 1.747  | 11.251 | 0.241  |
| h | -2.404 | 8.272  | -1.226 | h | 3.344  | 7.655  | 2.210  | c | 3.191  | 8.228  | 0.981  |
| h | -1.895 | 9.959  | -1.125 | h | 3.191  | 9.412  | 2.158  | h | 3.613  | 9.243  | 0.891  |
| c | -1.828 | 8.863  | 1.347  | c | 3.143  | 8.462  | -0.361 | h | 2.785  | 8.159  | 2.005  |
| h | -2.189 | 9.903  | 1.268  | h | 3.676  | 9.414  | -0.193 | c | 2.431  | 8.170  | -1.503 |
| h | -2.705 | 8.219  | 1.155  | h | 3.866  | 7.661  | -0.130 | h | 3.003  | 7.253  | -1.723 |

|   |        |        |        |   |        |        |        |   |       |        |        |
|---|--------|--------|--------|---|--------|--------|--------|---|-------|--------|--------|
| c | -1.308 | 8.608  | 2.763  | c | 2.726  | 8.365  | -1.831 | h | 1.519 | 8.112  | -2.119 |
| h | -0.958 | 7.565  | 2.846  | h | 2.217  | 7.403  | -2.008 | c | 3.256 | 9.385  | -1.931 |
| h | -0.429 | 9.246  | 2.954  | h | 1.988  | 9.152  | -2.059 | h | 2.678 | 10.309 | -1.761 |
| c | -2.369 | 8.873  | 3.837  | c | 3.915  | 8.494  | -2.789 | h | 4.165 | 9.466  | -1.311 |
| h | -3.254 | 8.240  | 3.643  | h | 4.662  | 7.715  | -2.553 | c | 3.669 | 9.319  | -3.406 |
| h | -2.718 | 9.918  | 3.756  | h | 4.421  | 9.461  | -2.616 | h | 2.764 | 9.245  | -4.035 |
| c | -1.870 | 8.617  | 5.262  | c | 3.525  | 8.388  | -4.266 | h | 4.238 | 8.388  | -3.582 |
| h | -1.520 | 7.572  | 5.344  | h | 3.028  | 7.417  | -4.443 | c | 4.507 | 10.516 | -3.862 |
| h | -0.986 | 9.250  | 5.458  | h | 2.771  | 9.161  | -4.500 | h | 3.936 | 11.448 | -3.696 |
| c | -2.927 | 8.881  | 6.339  | c | 4.709  | 8.532  | -5.227 | h | 5.408 | 10.594 | -3.227 |
| h | -3.810 | 8.248  | 6.142  | h | 5.463  | 7.762  | -4.990 | c | 4.934 | 10.443 | -5.331 |
| h | -3.276 | 9.924  | 6.256  | h | 5.202  | 9.504  | -5.051 | h | 4.035 | 10.365 | -5.966 |
| c | -2.419 | 8.622  | 7.759  | c | 4.309  | 8.420  | -6.699 | h | 5.504 | 9.512  | -5.496 |
| h | -3.199 | 8.820  | 8.510  | h | 5.178  | 8.530  | -7.364 | c | 5.773 | 11.643 | -5.777 |
| h | -2.095 | 7.577  | 7.882  | h | 3.847  | 7.444  | -6.913 | h | 6.065 | 11.561 | -6.834 |
| h | -1.558 | 9.266  | 7.997  | h | 3.579  | 9.198  | -6.973 | h | 5.215 | 12.585 | -5.658 |
| c | -0.656 | 8.740  | -2.417 | c | 1.624  | 8.422  | 3.277  | h | 6.695 | 11.726 | -5.182 |
| h | 0.240  | 9.380  | -2.347 | h | 0.906  | 9.255  | 3.192  | c | 4.312 | 7.200  | 0.810  |
| h | -0.291 | 7.701  | -2.466 | h | 1.031  | 7.494  | 3.219  | h | 3.907 | 6.183  | 0.941  |
| c | -1.413 | 9.075  | -3.706 | c | 2.326  | 8.491  | 4.638  | h | 4.716 | 7.244  | -0.216 |
| h | -2.315 | 8.440  | -3.777 | h | 3.038  | 7.650  | 4.724  | c | 5.460 | 7.409  | 1.804  |
| h | -1.778 | 10.117 | -3.657 | h | 2.935  | 9.412  | 4.690  | h | 5.872 | 8.427  | 1.679  |
| c | -0.569 | 8.896  | -4.972 | c | 1.363  | 8.457  | 5.827  | h | 5.063 | 7.366  | 2.834  |
| h | -0.208 | 7.853  | -5.025 | h | 0.746  | 7.543  | 5.772  | c | 6.588 | 6.385  | 1.651  |
| h | 0.335  | 9.526  | -4.899 | h | 0.657  | 9.304  | 5.750  | h | 6.980 | 6.424  | 0.618  |
| c | -1.318 | 9.237  | -6.264 | c | 2.066  | 8.510  | 7.187  | h | 6.177 | 5.367  | 1.781  |
| h | -2.222 | 8.608  | -6.336 | h | 2.767  | 7.660  | 7.265  | c | 7.745 | 6.590  | 2.634  |
| h | -1.677 | 10.280 | -6.210 | h | 2.688  | 9.421  | 7.239  | h | 8.156 | 7.606  | 2.502  |
| c | -0.465 | 9.055  | -7.522 | c | 1.098  | 8.484  | 8.371  | h | 7.354 | 6.553  | 3.665  |
| h | -0.121 | 8.014  | -7.621 | h | 0.486  | 7.568  | 8.364  | c | 8.864 | 5.559  | 2.472  |
| h | -1.029 | 9.308  | -8.432 | h | 1.632  | 8.519  | 9.332  | h | 9.296 | 5.596  | 1.460  |
| h | 0.428  | 9.697  | -7.493 | h | 0.409  | 9.342  | 8.341  | h | 9.680 | 5.733  | 3.189  |
| c | -1.672 | -8.649 | 0.383  | c | 0.247  | -8.822 | 0.736  | h | 8.489 | 4.537  | 2.635  |
| c | -0.580 | -9.455 | 0.744  | c | -1.017 | -9.412 | 0.568  | c | 0.408 | -9.045 | 0.977  |

|   |        |         |        |   |        |         |        |   |        |         |        |
|---|--------|---------|--------|---|--------|---------|--------|---|--------|---------|--------|
| c | 0.668  | -8.607  | 0.965  | c | -2.084 | -8.340  | 0.356  | c | -0.755 | -9.690  | 0.522  |
| c | 0.106  | -7.218  | 0.681  | c | -1.226 | -7.080  | 0.430  | c | -1.771 | -8.666  | 0.011  |
| c | -1.250 | -7.287  | 0.349  | c | 0.117  | -7.407  | 0.652  | c | -1.000 | -7.368  | 0.266  |
| c | 0.607  | -5.908  | 0.675  | c | -1.444 | -5.700  | 0.323  | c | 0.256  | -7.639  | 0.823  |
| c | -0.358 | -4.955  | 0.340  | c | -0.273 | -4.948  | 0.463  | c | -1.204 | -5.998  | 0.032  |
| c | -2.237 | -11.085 | 0.489  | c | 0.314  | -11.317 | 0.857  | c | -0.126 | -5.207  | 0.434  |
| c | -0.894 | -10.814 | 0.804  | c | -0.977 | -10.804 | 0.636  | c | 0.490  | -11.519 | 1.299  |
| s | -1.930 | -5.722  | 0.016  | s | 1.132  | -6.002  | 0.737  | c | -0.708 | -11.073 | 0.714  |
| s | -3.109 | -9.572  | 0.111  | s | 1.503  | -9.991  | 0.982  | s | 1.186  | -6.201  | 1.101  |
| h | -0.184 | -11.598 | 1.064  | h | -1.837 | -11.468 | 0.533  | s | 1.580  | -10.144 | 1.624  |
| h | 1.634  | -5.631  | 0.915  | h | -2.413 | -5.234  | 0.144  | h | -1.502 | -11.775 | 0.460  |
| c | 1.196  | -8.729  | 2.422  | c | -2.785 | -8.479  | -1.024 | h | -2.087 | -5.565  | -0.437 |
| h | 1.559  | -9.763  | 2.561  | h | -3.377 | -9.412  | -1.007 | c | -2.036 | -8.804  | -1.516 |
| h | 2.083  | -8.079  | 2.512  | h | -3.516 | -7.656  | -1.110 | h | -2.613 | -7.922  | -1.841 |
| c | 1.807  | -8.987  | -0.020 | c | -3.166 | -8.372  | 1.471  | h | -1.064 | -8.736  | -2.032 |
| h | 2.667  | -8.326  | 0.191  | h | -3.893 | -7.570  | 1.253  | c | -3.064 | -8.761  | 0.870  |
| h | 2.138  | -10.009 | 0.232  | h | -3.720 | -9.322  | 1.372  | h | -3.450 | -9.792  | 0.793  |
| c | 1.461  | -8.915  | -1.508 | c | -2.661 | -8.223  | 2.908  | h | -2.775 | -8.626  | 1.925  |
| h | 0.591  | -9.561  | -1.716 | h | -1.924 | -9.014  | 3.125  | c | -4.186 | -7.780  | 0.522  |
| h | 1.153  | -7.889  | -1.768 | h | -2.128 | -7.264  | 3.015  | h | -3.817 | -6.745  | 0.614  |
| c | 2.628  | -9.337  | -2.406 | c | -3.795 | -8.290  | 3.938  | h | -4.492 | -7.910  | -0.530 |
| h | 2.936  | -10.366 | -2.147 | h | -4.321 | -9.257  | 3.840  | c | -5.415 | -7.948  | 1.423  |
| h | 3.503  | -8.696  | -2.196 | h | -4.544 | -7.511  | 3.709  | h | -5.114 | -7.817  | 2.478  |
| c | 2.302  | -9.272  | -3.901 | c | -3.319 | -8.120  | 5.384  | h | -5.790 | -8.985  | 1.342  |
| h | 1.424  | -9.909  | -4.111 | h | -2.562 | -8.891  | 5.612  | c | -6.548 | -6.973  | 1.094  |
| h | 2.000  | -8.242  | -4.164 | h | -2.802 | -7.149  | 5.485  | h | -6.170 | -5.937  | 1.168  |
| c | 3.463  | -9.702  | -4.803 | c | -4.448 | -8.201  | 6.416  | h | -6.853 | -7.109  | 0.040  |
| h | 3.763  | -10.731 | -4.540 | h | -4.958 | -9.175  | 6.318  | c | -7.776 | -7.125  | 1.997  |
| h | 4.341  | -9.067  | -4.591 | h | -5.207 | -7.436  | 6.182  | h | -7.470 | -6.987  | 3.049  |
| c | 3.128  | -9.631  | -6.294 | c | -3.965 | -8.019  | 7.856  | h | -8.154 | -8.159  | 1.924  |
| h | 3.979  | -9.948  | -6.915 | h | -4.797 | -8.085  | 8.573  | c | -8.899 | -6.144  | 1.657  |
| h | 2.275  | -10.282 | -6.541 | h | -3.228 | -8.790  | 8.129  | h | -9.766 | -6.274  | 2.322  |
| h | 2.860  | -8.607  | -6.594 | h | -3.483 | -7.039  | 7.993  | h | -8.559 | -5.101  | 1.754  |
| c | 0.196  | -8.386  | 3.529  | c | -1.872 | -8.477  | -2.251 | h | -9.250 | -6.282  | 0.623  |

|   |        |        |        |   |        |        |        |   |        |         |        |
|---|--------|--------|--------|---|--------|--------|--------|---|--------|---------|--------|
| h | -0.157 | -7.349 | 3.400  | h | -1.266 | -7.555 | -2.259 | c | -2.763 | -10.072 | -1.971 |
| h | -0.695 | -9.030 | 3.435  | h | -1.160 | -9.316 | -2.184 | h | -2.171 | -10.961 | -1.694 |
| c | 0.788  | -8.549 | 4.933  | c | -2.655 | -8.578 | -3.565 | h | -3.730 | -10.165 | -1.449 |
| h | 1.141  | -9.588 | 5.064  | h | -3.273 | -9.494 | -3.555 | c | -3.012 | -10.091 | -3.484 |
| h | 1.683  | -7.909 | 5.031  | h | -3.366 | -7.733 | -3.632 | h | -3.603 | -9.202  | -3.767 |
| c | -0.201 | -8.209 | 6.053  | c | -1.765 | -8.585 | -4.810 | h | -2.047 | -9.996  | -4.013 |
| h | -1.098 | -8.847 | 5.953  | h | -1.063 | -9.436 | -4.752 | c | -3.733 | -11.352 | -3.969 |
| h | -0.553 | -7.169 | 5.925  | h | -1.138 | -7.675 | -4.816 | h | -4.694 | -11.453 | -3.432 |
| c | 0.380  | -8.376 | 7.460  | c | -2.548 | -8.666 | -6.124 | h | -3.138 | -12.241 | -3.697 |
| h | 0.730  | -9.415 | 7.586  | h | -3.177 | -9.573 | -6.116 | c | -3.998 | -11.366 | -5.478 |
| h | 1.277  | -7.740 | 7.559  | h | -3.247 | -7.813 | -6.182 | h | -4.594 | -10.477 | -5.749 |
| c | -0.616 | -8.033 | 8.569  | c | -1.652 | -8.676 | -7.364 | h | -3.039 | -11.264 | -6.014 |
| h | -1.509 | -8.676 | 8.515  | h | -0.967 | -9.538 | -7.353 | c | -4.719 | -12.629 | -5.953 |
| h | -0.172 | -8.164 | 9.567  | h | -2.243 | -8.732 | -8.290 | h | -5.696 | -12.739 | -5.458 |
| h | -0.956 | -6.989 | 8.490  | h | -1.035 | -7.765 | -7.416 | h | -4.895 | -12.610 | -7.038 |
| c | 3.677  | -0.617 | -0.379 | c | 3.719  | -0.643 | -0.047 | h | -4.130 | -13.532 | -5.727 |
| h | 3.286  | -0.658 | -1.409 | h | 3.347  | -0.965 | -1.033 | c | 3.535  | 0.186   | -0.607 |
| h | 3.710  | -1.648 | 0.018  | h | 3.787  | -1.530 | 0.608  | h | 3.162  | 1.127   | -1.046 |
| c | 5.085  | -0.020 | -0.350 | c | 5.105  | -0.005 | -0.174 | h | 3.345  | -0.624  | -1.333 |
| h | 4.976  | 1.077  | -0.436 | h | 4.966  | 0.994  | -0.627 | c | 5.021  | 0.292   | -0.275 |
| c | 5.851  | -0.339 | 0.949  | c | 5.826  | 0.161  | 1.178  | h | 5.102  | 1.006   | 0.566  |
| h | 5.963  | -1.436 | 1.025  | h | 5.916  | -0.834 | 1.650  | c | 5.611  | -1.046  | 0.217  |
| h | 6.874  | 0.059  | 0.838  | h | 6.858  | 0.485  | 0.964  | h | 6.634  | -0.848  | 0.581  |
| c | 5.244  | 0.206  | 2.244  | c | 5.199  | 1.146  | 2.169  | h | 5.033  | -1.379  | 1.094  |
| h | 4.253  | -0.222 | 2.450  | h | 4.203  | 0.825  | 2.499  | c | 5.657  | -2.171  | -0.821 |
| h | 5.897  | -0.020 | 3.100  | h | 5.836  | 1.252  | 3.060  | h | 6.260  | -1.897  | -1.699 |
| h | 5.121  | 1.299  | 2.196  | h | 5.090  | 2.144  | 1.717  | h | 6.105  | -3.077  | -0.386 |
| c | 5.875  | -0.525 | -1.578 | c | 5.963  | -0.856 | -1.137 | h | 4.654  | -2.449  | -1.176 |
| h | 5.754  | -1.621 | -1.664 | h | 5.922  | -1.915 | -0.822 | c | 5.796  | 0.888   | -1.468 |
| h | 6.949  | -0.360 | -1.390 | h | 7.016  | -0.551 | -1.014 | h | 5.489  | 0.391   | -2.405 |
| c | 5.505  | 0.138  | -2.910 | c | 5.597  | -0.748 | -2.622 | h | 6.866  | 0.650   | -1.341 |
| h | 4.428  | 0.014  | -3.116 | h | 4.552  | -1.061 | -2.789 | c | 5.649  | 2.407   | -1.626 |
| h | 5.676  | 1.226  | -2.830 | h | 5.649  | 0.312  | -2.930 | h | 4.584  | 2.676   | -1.741 |
| c | 6.301  | -0.411 | -4.099 | c | 6.510  | -1.581 | -3.528 | h | 5.990  | 2.899   | -0.698 |



|   |        |         |        |   |        |         |        |   |        |         |        |
|---|--------|---------|--------|---|--------|---------|--------|---|--------|---------|--------|
| h | 6.123  | -1.498  | -4.183 | h | 6.458  | -2.639  | -3.218 | c | 6.430  | 2.979   | -2.814 |
| h | 7.380  | -0.295  | -3.898 | h | 7.557  | -1.270  | -3.371 | h | 6.083  | 2.495   | -3.743 |
| c | 5.951  | 0.268   | -5.424 | c | 6.157  | -1.464  | -5.012 | h | 7.495  | 2.709   | -2.709 |
| h | 6.537  | -0.146  | -6.258 | h | 6.829  | -2.071  | -5.635 | c | 6.297  | 4.497   | -2.947 |
| h | 4.886  | 0.139   | -5.669 | h | 5.127  | -1.803  | -5.204 | h | 6.868  | 4.880   | -3.805 |
| h | 6.152  | 1.350   | -5.382 | h | 6.232  | -0.421  | -5.358 | h | 5.246  | 4.794   | -3.088 |
| c | -2.957 | -12.304 | 0.426  | c | 0.653  | -12.685 | 0.966  | h | 6.669  | 5.008   | -2.044 |
| c | 2.842  | 12.301  | 0.726  | c | -0.753 | 12.710  | 0.034  | c | -3.725 | 0.362   | 0.690  |
| h | -4.014 | -12.254 | 0.141  | h | -0.185 | -13.384 | 0.857  | h | -3.804 | 1.250   | 0.043  |
| h | 3.928  | 12.233  | 0.857  | h | 0.069  | 13.415  | 0.199  | h | -3.370 | 0.680   | 1.686  |
| c | 2.382  | 13.591  | 0.692  | c | -1.954 | 13.317  | -0.228 | c | -5.081 | -0.333  | 0.805  |
| c | 3.309  | 14.728  | 0.819  | c | -2.061 | 14.783  | -0.276 | h | -5.287 | -0.801  | -0.176 |
| n | 2.592  | 15.951  | 0.738  | n | -3.396 | 15.163  | -0.573 | c | -5.041 | -1.442  | 1.873  |
| c | 1.233  | 15.882  | 0.577  | c | -4.316 | 14.162  | -0.748 | h | -4.086 | -1.983  | 1.783  |
| c | -2.523 | -13.580 | 0.674  | c | 1.857  | -13.301 | 1.187  | h | -5.036 | -0.970  | 2.872  |
| c | -3.435 | -14.728 | 0.545  | c | 1.950  | -14.768 | 1.256  | c | -6.191 | -2.447  | 1.780  |
| n | -2.746 | -15.933 | 0.845  | n | 3.294  | -15.159 | 1.484  | h | -6.187 | -2.962  | 0.807  |
| c | -1.424 | -15.839 | 1.195  | c | 4.232  | -14.166 | 1.605  | h | -6.110 | -3.214  | 2.564  |
| c | -3.466 | -17.212 | 0.802  | c | 3.625  | -16.584 | 1.612  | h | -7.175 | -1.967  | 1.895  |
| h | -2.738 | -17.973 | 0.490  | h | 4.639  | -16.710 | 1.212  | c | -6.181 | 0.711   | 1.085  |
| h | -4.237 | -17.098 | 0.028  | h | 2.906  | -17.118 | 0.977  | h | -7.070 | 0.190   | 1.476  |
| c | -4.094 | -17.573 | 2.146  | c | 3.541  | -17.072 | 3.056  | h | -5.845 | 1.378   | 1.900  |
| h | -4.624 | -18.532 | 2.058  | h | 3.787  | -18.143 | 3.097  | c | -6.608 | 1.551   | -0.124 |
| h | -3.324 | -17.679 | 2.922  | h | 4.255  | -16.533 | 3.694  | h | -5.739 | 2.082   | -0.552 |
| h | -4.820 | -16.810 | 2.457  | h | 2.527  | -16.940 | 3.457  | h | -6.972 | 0.878   | -0.920 |
| c | 3.313  | 17.225  | 0.860  | c | -3.747 | 16.586  | -0.647 | c | -7.697 | 2.577   | 0.207  |
| h | 2.776  | 17.952  | 0.237  | h | -4.549 | 16.675  | -1.393 | h | -7.331 | 3.251   | 1.001  |
| h | 4.313  | 17.047  | 0.442  | h | -2.847 | 17.101  | -1.008 | h | -8.570 | 2.053   | 0.633  |
| c | 3.407  | 17.705  | 2.307  | c | -4.190 | 17.147  | 0.702  | c | -8.136 | 3.403   | -1.004 |
| h | 3.962  | 18.653  | 2.343  | h | -4.436 | 18.213  | 0.595  | h | -8.918 | 4.129   | -0.736 |
| h | 2.407  | 17.877  | 2.727  | h | -5.085 | 16.625  | 1.068  | h | -7.291 | 3.967   | -1.429 |
| h | 3.939  | 16.973  | 2.929  | h | -3.388 | 17.054  | 1.447  | h | -8.538 | 2.759   | -1.801 |
| s | -0.916 | -14.125 | 1.162  | s | 3.448  | -12.569 | 1.421  | c | 0.810  | -12.863 | 1.603  |
| s | 0.725  | 14.169  | 0.500  | s | -3.523 | 12.571  | -0.549 | c | -0.668 | 12.437  | 1.018  |

|   |        |         |        |   |        |         |        |   |        |         |       |
|---|--------|---------|--------|---|--------|---------|--------|---|--------|---------|-------|
| s | -0.385 | -17.067 | 1.594  | s | 5.859  | -14.333 | 1.873  | h | 0.038  | -13.597 | 1.346 |
| s | 0.156  | 17.136  | 0.455  | s | -5.929 | 14.314  | -1.099 | h | 0.144  | 13.146  | 0.817 |
| o | 4.525  | 14.678  | 0.969  | o | -1.162 | 15.598  | -0.097 | c | -1.839 | 13.037  | 1.397 |
| o | -4.618 | -14.701 | 0.224  | o | 1.033  | -15.574 | 1.136  | c | -1.936 | 14.502  | 1.505 |
| o | -2.808 | -0.213  | -0.119 | o | -2.794 | -0.287  | 0.086  | n | -3.247 | 14.876  | 1.895 |
| c | -3.540 | 0.593   | -1.075 | c | -3.611 | 0.618   | -0.693 | c | -4.156 | 13.871  | 2.109 |
| h | -2.942 | 0.662   | -1.998 | h | -3.071 | 0.867   | -1.620 | c | 1.923  | -13.416 | 2.179 |
| h | -3.685 | 1.616   | -0.681 | h | -3.785 | 1.553   | -0.129 | c | 2.008  | -14.867 | 2.412 |
| c | -4.904 | -0.043  | -1.353 | c | -4.958 | -0.037  | -1.007 | n | 3.248  | -15.189 | 3.021 |
| h | -4.742 | -1.133  | -1.445 | h | -4.752 | -1.073  | -1.335 | c | 4.112  | -14.157 | 3.286 |
| c | -5.929 | 0.209   | -0.230 | c | -5.909 | -0.083  | 0.204  | c | 3.544  | -16.583 | 3.373 |
| c | -5.444 | 0.481   | -2.701 | c | -5.622 | 0.718   | -2.181 | h | 4.631  | -16.708 | 3.278 |
| h | -6.080 | 1.300   | -0.137 | h | -6.079 | 0.952   | 0.553  | h | 3.033  | -17.200 | 2.622 |
| h | -6.897 | -0.198  | -0.566 | h | -6.888 | -0.441  | -0.157 | c | 3.073  | -16.939 | 4.781 |
| c | -5.592 | -0.383  | 1.141  | c | -5.471 | -0.957  | 1.383  | h | 3.311  | -17.991 | 4.994 |
| h | -5.364 | 1.584   | -2.723 | h | -5.614 | 1.802   | -1.968 | h | 3.577  | -16.316 | 5.531 |
| h | -6.525 | 0.262   | -2.747 | h | -6.687 | 0.430   | -2.214 | h | 1.986  | -16.811 | 4.875 |
| c | -4.776 | -0.107  | -3.948 | c | -5.007 | 0.462   | -3.561 | c | -3.574 | 16.295  | 2.084 |
| h | -4.677 | 0.050   | 1.566  | h | -4.546 | -0.593  | 1.847  | h | -4.631 | 16.413  | 1.811 |
| h | -6.415 | -0.203  | 1.850  | h | -6.254 | -0.981  | 2.155  | h | -2.944 | 16.846  | 1.374 |
| h | -5.439 | -1.471  | 1.076  | h | -5.291 | -1.994  | 1.059  | c | -3.322 | 16.765  | 3.514 |
| h | -3.689 | 0.090   | -3.935 | h | -3.939 | 0.742   | -3.568 | h | -3.574 | 17.831  | 3.601 |
| h | -4.884 | -1.207  | -3.931 | h | -5.038 | -0.621  | -3.776 | h | -3.946 | 16.207  | 4.225 |
| c | -5.357 | 0.435   | -5.258 | c | -5.719 | 1.220   | -4.687 | h | -2.265 | 16.641  | 3.787 |
| h | -5.250 | 1.534   | -5.274 | h | -5.688 | 2.302   | -4.471 | s | 3.390  | -12.612 | 2.748 |
| h | -6.443 | 0.237   | -5.281 | h | -6.787 | 0.943   | -4.691 | s | -3.384 | 12.285  | 1.808 |
| c | -4.700 | -0.162  | -6.504 | c | -5.116 | 0.957   | -6.068 | s | 5.612  | -14.243 | 3.985 |
| h | -5.139 | 0.243   | -7.426 | h | -5.646 | 1.515   | -6.853 | s | -5.741 | 14.016  | 2.569 |
| h | -3.620 | 0.053   | -6.526 | h | -4.057 | 1.258   | -6.104 | o | -1.046 | 15.320  | 1.294 |
| h | -4.820 | -1.257  | -6.531 | h | -5.165 | -0.112  | -6.327 | o | 1.162  | -15.712 | 2.138 |

---
